# Supplementary material
Source: MDPI journal article supplement (https://www.mdpi.com/2504-477X/7/3/104)
Supplement: s1 [file s1]

## 1. Supplementary Information

### 1.1. Thermogravimetric analysis

**Table S1.** Thermogravimetric analysis of composite filaments and the percentage residual weight.

| Filament   |             | Fil3D             | FilText           |
|------------|-------------|-------------------|-------------------|
|            |             | Residue<br>(wt.%) | Residue<br>(wt.%) |
| PLA        |             | -                 | -                 |
| PLA + 0.25 | EG          | 0.43±0.21         | 0.20±0.25         |
| PLA + 0.5  |             | 0.74±0.22         | 0.39±0.31         |
| PLA + 1    |             | 1.02±0.88         | 1.14±1.30         |
| PLA + 2    |             | 1.44±0.37         | 2.34±1.74         |
| PLA + 0.25 | f-EG        | 0.23±0.25         | 0.48±0.74         |
| PLA + 0.5  |             | 0.73±0.16         | 0.36±0.58         |
| PLA + 1    |             | 1.13±1.17         | 1.15±0.26         |
| PLA + 2    |             | 2.00±0.96         | 2.18±1.72         |
| PLA + 0.25 | [(f-EG)+Ag] | 0.26±0.14         | 0.21±0.85         |
| PLA + 0.5  |             | 0.55±0.27         | 0.53±0.44         |
| PLA + 1    |             | 1.43±1.40         | 1.06±1.10         |
| PLA + 2    |             | 2.04±0.85         | 1.02±0.22         |

### 1.2. Melt flow index

**Table S2.** MFI of filaments containing PLA and PLA reinforced with 0.5 and 2 wt.% of EG, f-EG and [(f-EG)+Ag].

| Fil3D   |             | MFI (g/10min) |
|---------|-------------|---------------|
| PLA     |             | 14.50 ± 0.86  |
| PLA+0.5 | EG          | 13.22 ± 1.10  |
| PLA+2   |             | 15.79 ± 0.89  |
| PLA+0.5 | f-EG        | 10.33 ± 0.73  |
| PLA+2   |             | 14.26 ± 1.73  |
| PLA+0.5 | [(f-EG)+Ag] | 10.15 ± 0.97  |
| PLA+2   |             | 12.09 ± 0.85  |

### 1.3. Digital Microscopy Characterization

Digital microscopy images of the 3D-printed scaffolds at all the compositions of EG, f-EG, and [(f-EG)+Ag] are displayed in Figure S1-S4.

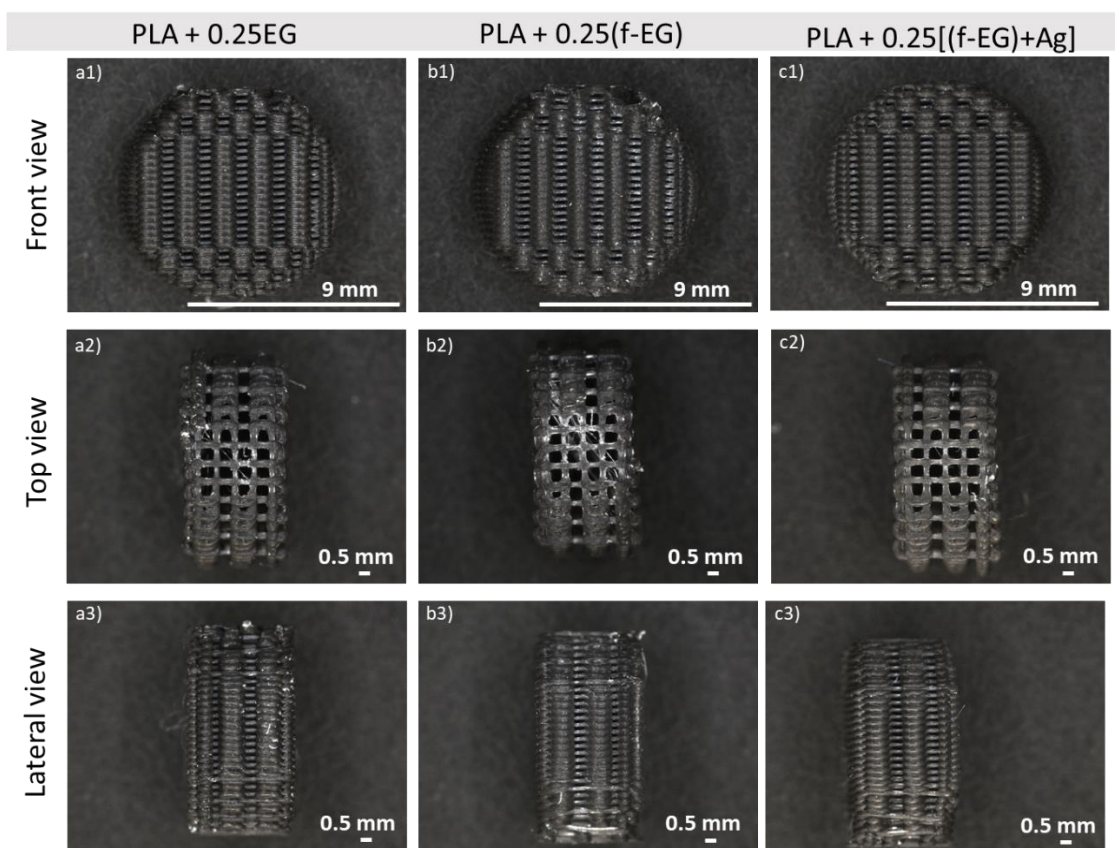

**Figure S1.** Digital microscopy images of 3D-printed scaffolds containing (a1-a3—PLA+0.25EG; b1-b3—PLA+0.25(f-EG) and c1-c3—PLA+0.25[(f-EG)+Ag]) from a front, top, and side perspectives.

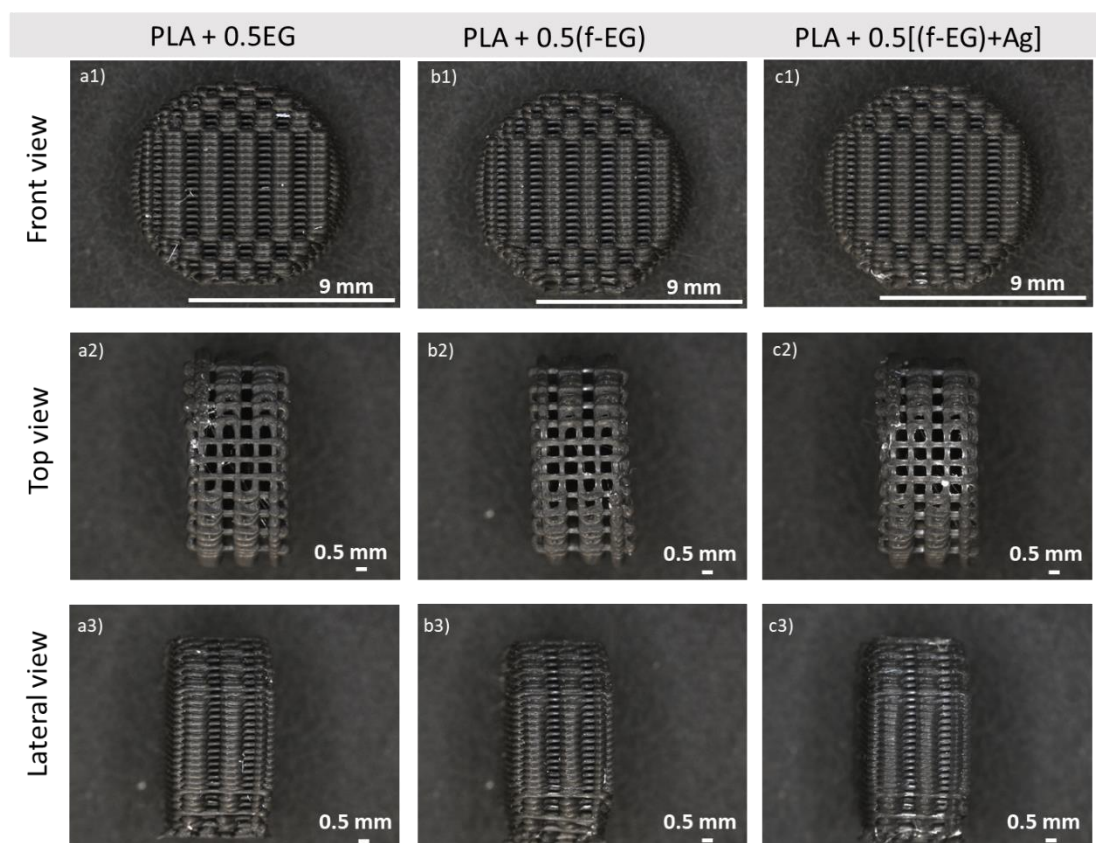

**Figure S2.** Digital microscopy images of 3D-printed scaffolds containing (**a1-a3**—PLA+0.5EG; **b1-b3**—PLA+0.5(f-EG) and **c1-c3**—PLA+0.5[(f-EG)+Ag]) from a front, top, and side perspectives.

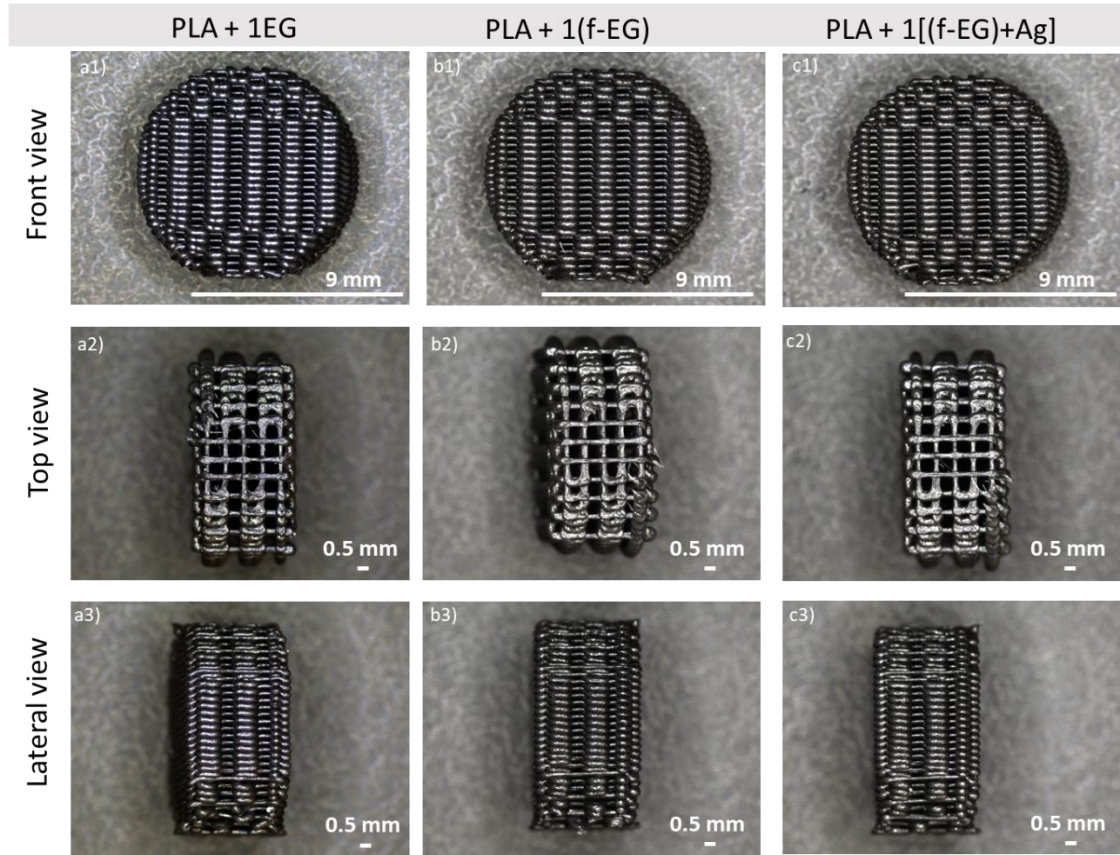

**Figure S3.** Digital microscopy images of 3D-printed scaffolds containing (**a1-a3**—PLA+1EG; **b1-b3**—PLA+1(f-EG) and **c1-c3**—PLA+1[(f-EG)+Ag]) from a front, top, and side perspectives.

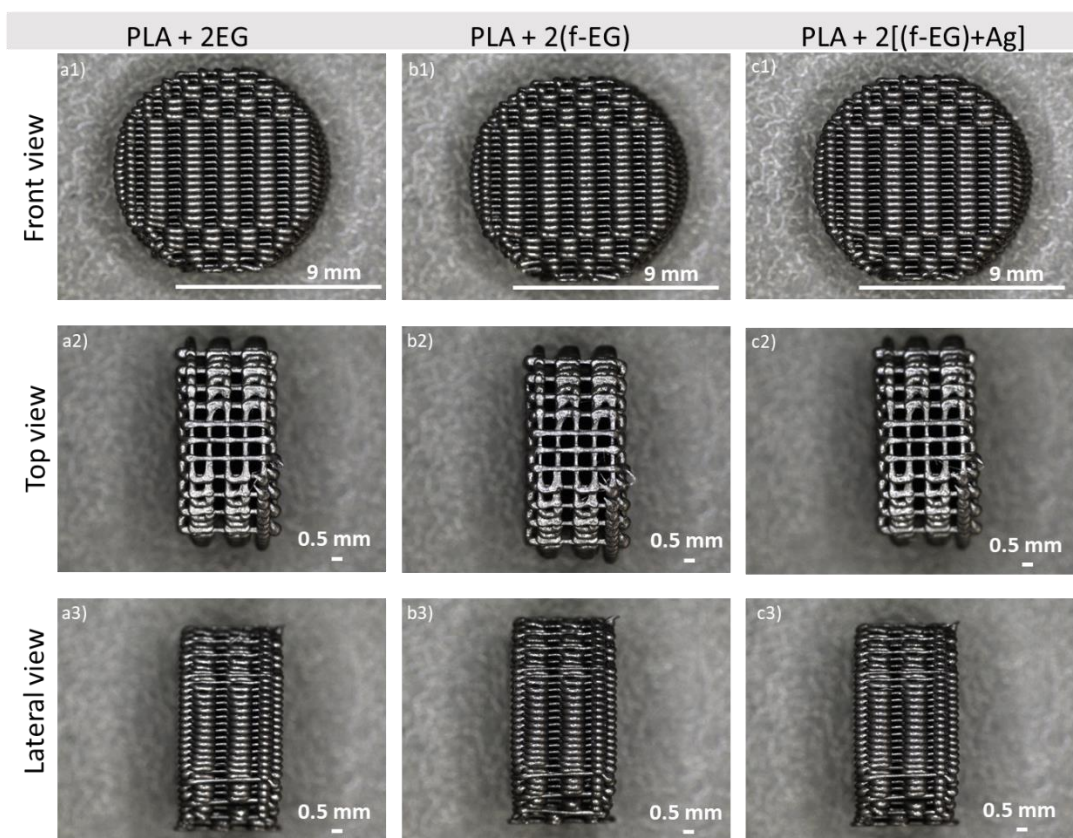

**Figure S4.** Digital microscopy images of 3D-printed scaffolds containing: **a1-a3**—PLA+2EG; **b1-b3**—PLA+2(f-EG) and **c1-c3**—PLA+2[(f-EG)+Ag], from a front, top, and side perspectives.

#### 1.4. Micro Computed Tomography Characterization

Micro-CT cross-section images of the 3D-printed scaffolds containing 0.25, 0.5 and 1 wt.% of EG, f-EG and[(f-EG)+Ag] are displayed in Figure S5.



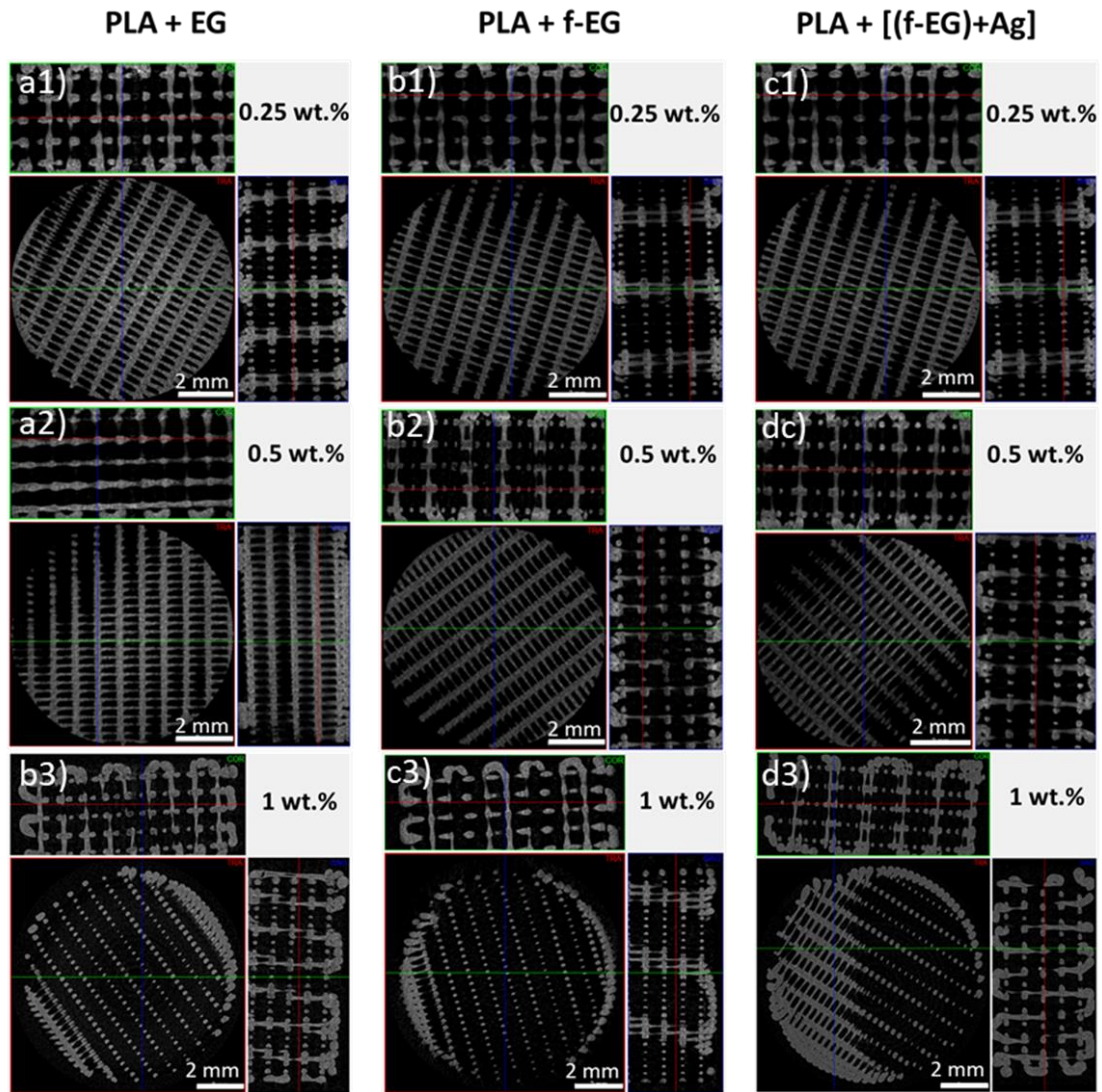

**Figure S5.** Representative micro-CT cross-sections images of the 3D-printed scaffolds containing PLA reinforced with 0.25, 0.5, 1 wt.% of EG, (f-EG) and [(f-EG)+Ag].

**Table S3.** Mean porosity, pore size, and filament thickness of 3D-printed scaffolds containing composites of EG, f-EG, and 0.25 and 1wt.% of [(f-EG)+Ag], calculated from the micro-CT data.

| 3D-Printed Scaffold |    | Mean Porosity (%) | Mean filament thickness ( $\mu\text{m}$ ) | Mean pore size ( $\mu\text{m}$ ) |
|---------------------|----|-------------------|-------------------------------------------|----------------------------------|
| PLA                 |    | $66.8 \pm 1.5$    | $240 \pm 3$                               | $484 \pm 4$                      |
| PLA+0.25            |    | $69.2 \pm 0.8$    | $248 \pm 17$                              | $494 \pm 2$                      |
| PLA+0.5             | EG | $70.2 \pm 2.9$    | $233 \pm 5$                               | $515 \pm 25$                     |
| PLA+1               |    | $69.68 \pm 0.9$   | $235 \pm 9$                               | $492 \pm 29$                     |
| PLA+2               |    | $70.29 \pm 2.5$   | $228 \pm 16$                              | $486 \pm 44$                     |

|                 |                    |                 |              |              |
|-----------------|--------------------|-----------------|--------------|--------------|
| <b>PLA+0.25</b> | <b>f-EG</b>        | $75.41 \pm 1.5$ | $212 \pm 7$  | $539 \pm 11$ |
| <b>PLA+0.5</b>  |                    | $73.38 \pm 4.3$ | $218 \pm 14$ | $517 \pm 29$ |
| <b>PLA+1</b>    |                    | $68.73 \pm 0.9$ | $249 \pm 12$ | $485 \pm 2$  |
| <b>PLA+2</b>    |                    | $70.4 \pm 1.1$  | $235 \pm 10$ | $496 \pm 20$ |
| <b>PLA+0.25</b> | <b>[(f-EG)+Ag]</b> | $70.5 \pm 1.4$  | $234 \pm 13$ | $508 \pm 10$ |
| <b>PLA+1</b>    |                    | $70.8 \pm 3.3$  | $271 \pm 7$  | $530 \pm 46$ |

### 1.5. Scanning Electron Microscopy Characterization

Micrographs of 3D-printed scaffolds reinforced with 1 wt.% EG, (f-EG) and [(f-EG)+Ag] are displayed in Figure S6.

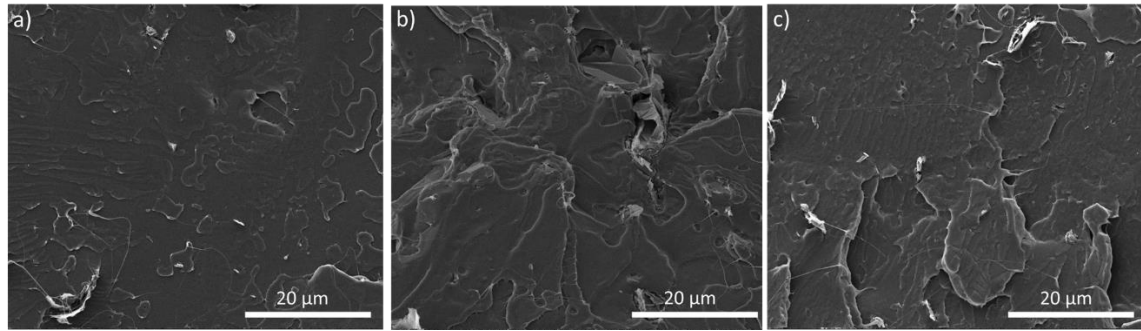

**Figure S6.** SEM images of 3D-printed scaffolds: **a1**—PLA+1EG; **b**— PLA+1(f-EG) and **c**— PLA+1 [(f-EG)+Ag].

### 1.6. Compression test of 3D-printed scaffolds

Scaffold stress-strain curve of the 3D-printed scaffolds containing 0.25, 0.5, 1 and 2 wt.% of EG, f-EG and [(f-EG)+Ag] are displayed in Figure S7.

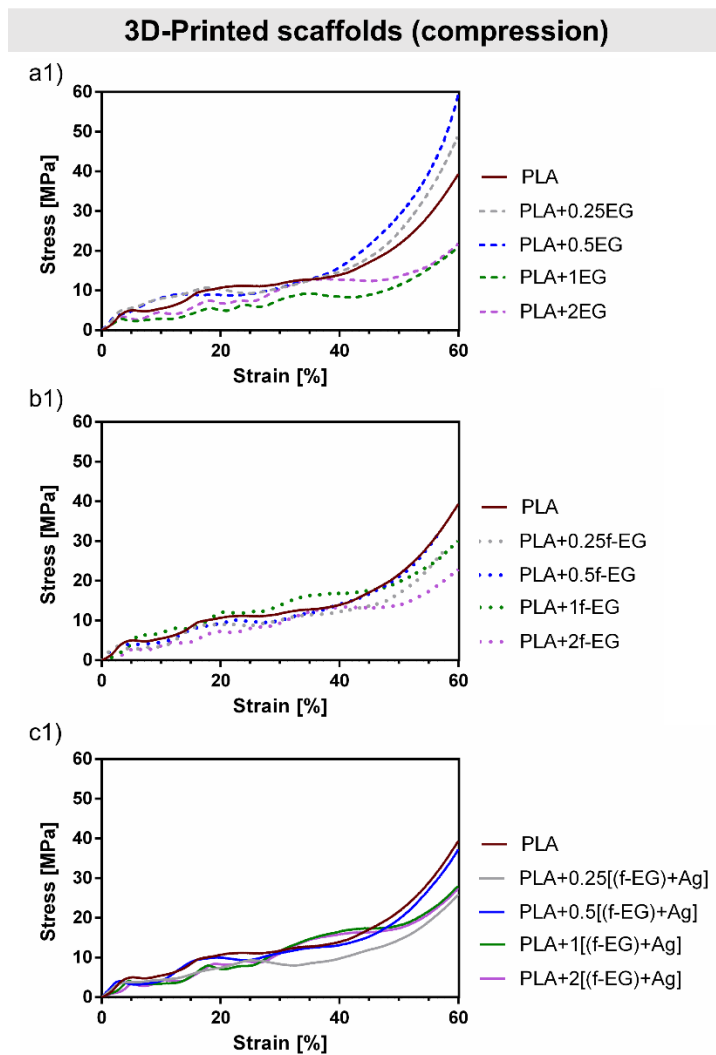

**Figure S7.** Compressive tests of 3D-printed scaffolds containing PLA and **a1**— EG, **b1**— f-EG and **c1**— [(f-EG)+Ag].
